# Supplementary figures and images for: Efficacy of the Posterior Accessory Saphenous Vein as a Vein Graft in Breast Reconstruction Using Profunda Artery Perforator Flap
Source: PubMed Central journal article supplement — Plast Reconstr Surg Glob Open. 2024 Sep 4;12(9):e6129. doi: 10.1097/GOX.0000000000006129 (PMC11374242; doi:10.1097/gox.0000000000006129), 2024-09-04

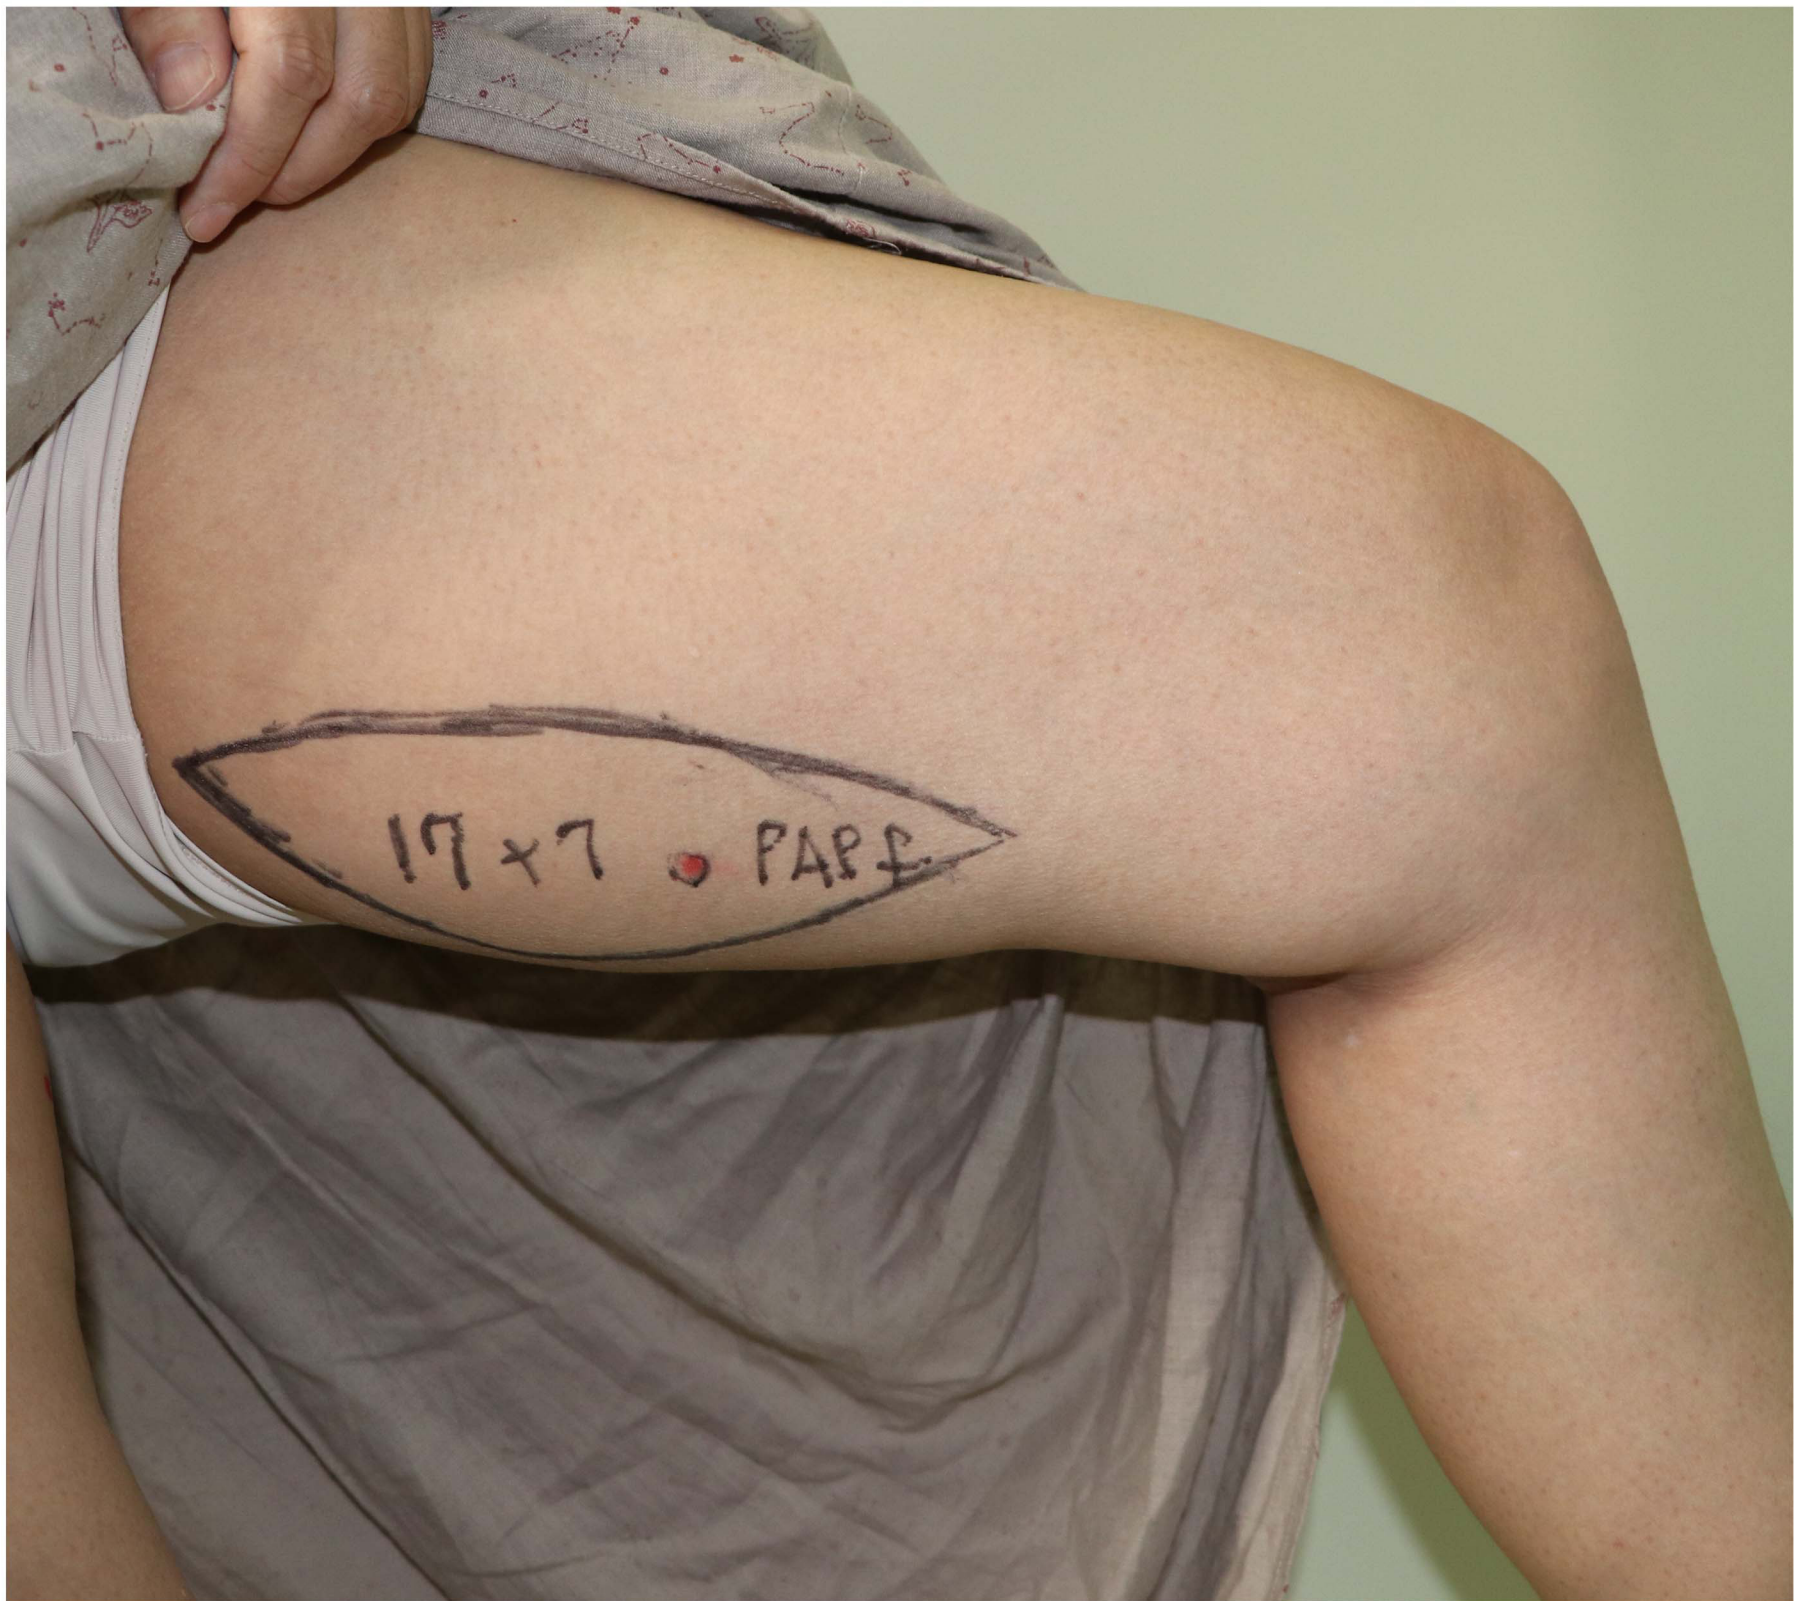

Flap design in Case 1

Supplement: gox-12-e6129-s001.pdf [file gox-12-e6129-s001.pdf]

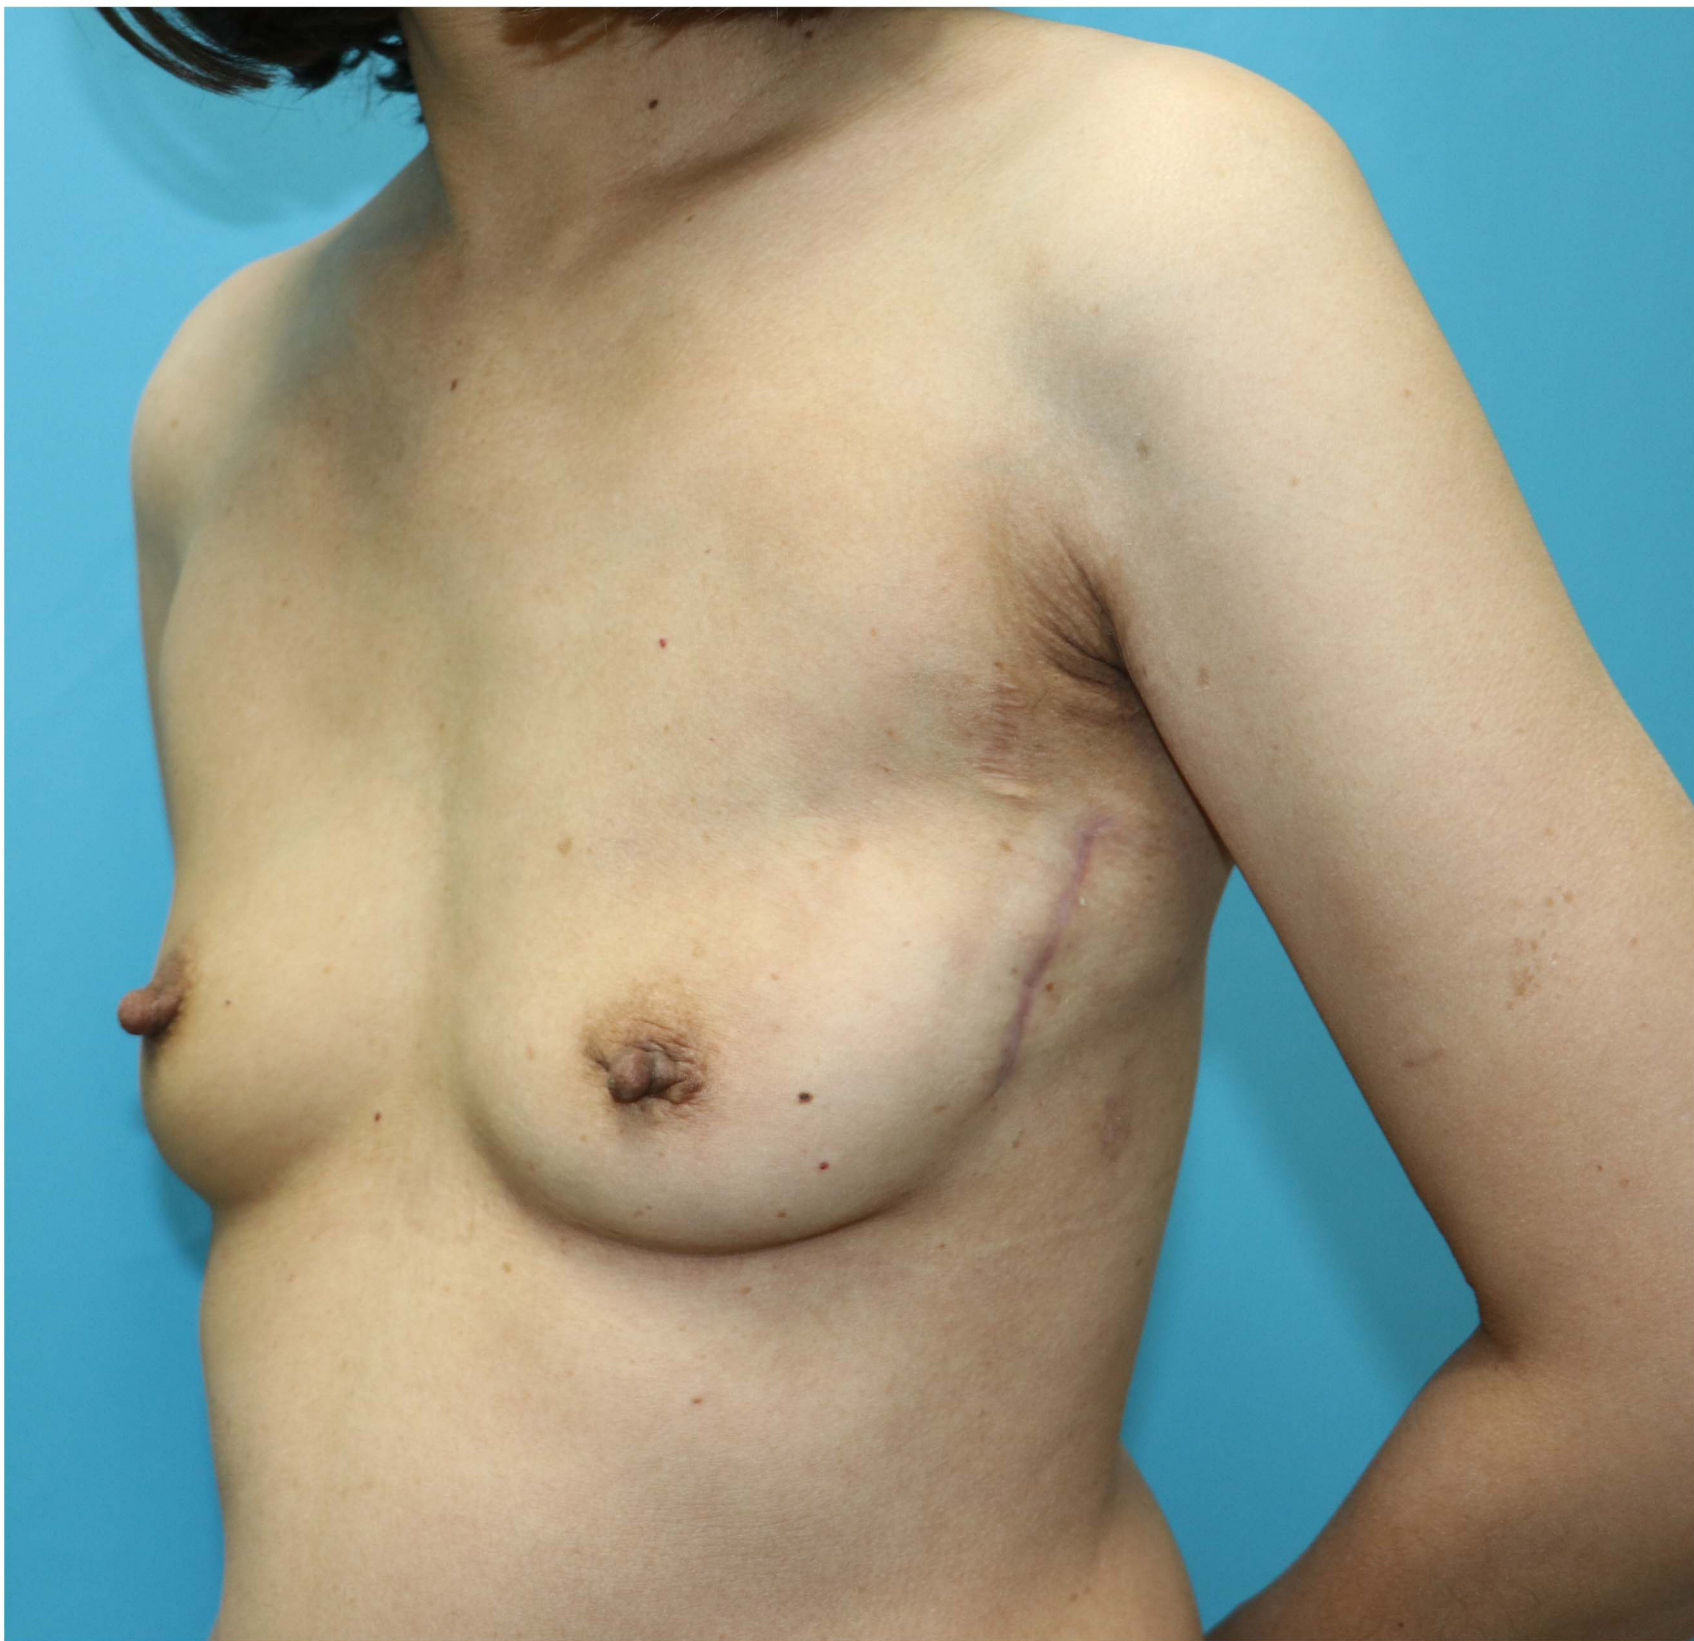

**Postoperative view at 6 months**

Supplement: gox-12-e6129-s002.pdf [file gox-12-e6129-s002.pdf]
